# Supplementary material for: Validity and Reliability of the 23-Item Preterm Birth Risk Assessment Scale
Source: Preprints.org preprint supplement (doi:10.20944/preprints202301.0080.v1), 2023-01-04
Supplement: Supplementary file 1 [file supplementary]

**Supplement 1. The Preterm Birth Risk Assessment Scale-Korean Version [PBRAS-23-K]**

We would like to evaluate the preterm labor risk by assessing what symptom(s) you experienced ***during your pregnancy,*** specifically from the 20th week of pregnancy to labor.

Please check **V** for the following questions that apply to you.

| | **Questions** | **Never**  **(0)** | **Rarely**  **(1)** | **Sometimes**  **(2)** | **Often**  **(3)** | | --- | --- | --- | --- | --- | | 1. I have anemia (hemoglobin level lower than 10 g/dL). |  |  |  |  | | 2. I feel depressed. |  |  |  |  | | 3. I don’t take the prescribed medication. |  |  |  |  | | 4. I cannot sleep well. |  |  |  |  | | 5. My belly feels tight and hard often. |  |  |  |  | | 6. I feel pelvic pressure. |  |  |  |  | | 7. I feel deep penetrating pain. |  |  |  |  | | 8. I have dull pain in my back and belly. |  |  |  |  | | 9. I have lots of stress (at home/work). |  |  |  |  | | 10. I feel very sensitive (at home/work). |  |  |  |  | | 11. It is hard to work on my feet (at home/work). |  |  |  |  | | 12. I have too heavy of a workload (at home/work). |  |  |  |  | | 13. I have intense muscle pain. |  |  |  |  | | 14. I’m worried about the baby being born too early. |  |  |  |  | | 15. I try to hang tight even for one more day for my baby. |  |  |  |  | | 16. I feel nervous to hear that I have a short cervix. |  |  |  |  | | 17. I feel sad to hear that I could have preterm labor. |  |  |  |  | | 18. I get stressed by hearing negative things from my doctor. |  |  |  |  | | 19. I feel stressed by being responsible for all of the housework. |  |  |  |  | | 20. I rest fewer than two hours a day. |  |  |  |  | | 21. I get annoyed at my husband from time to time. |  |  |  |  | | 22. I eat fewer than four times a day. |  |  |  |  | | 23. What I want from my husband is not to do anything but to just listen to me, but I am sad he doesn’t understand it. |  |  |  |  | | |  |  |
| --- | --- | --- | --- | --- | --- | --- | --- | --- | --- | --- | --- | --- | --- | --- | --- | --- | --- | --- | --- | --- | --- | --- | --- | --- | --- | --- | --- | --- | --- | --- | --- | --- | --- | --- | --- | --- | --- | --- | --- | --- | --- | --- | --- | --- | --- | --- | --- | --- | --- | --- | --- | --- | --- | --- | --- | --- | --- | --- | --- | --- | --- | --- | --- | --- | --- | --- | --- | --- | --- | --- | --- | --- | --- | --- | --- | --- | --- | --- | --- | --- | --- | --- | --- | --- | --- | --- | --- | --- | --- | --- | --- | --- | --- | --- | --- | --- | --- | --- | --- | --- | --- | --- | --- | --- | --- | --- | --- | --- | --- | --- | --- | --- | --- | --- | --- | --- | --- | --- | --- | --- | --- | --- | --- |
|  |

.

| Supplement 2. Internal Consistency of Each Factor | | | | |
| --- | --- | --- | --- | --- |
| Factor | Number of items (item number) | Mean ± SD | Item mean ± variance | Cronbach’s α |
| 1 | 5 (22, 23, 24, 25, 26) | 9.34±3.86 | 1.87 ±1.09 | .80 |
| 2 | 4 (13, 14, 15, 20) | 9.04±3.01 | 1.57± 0.85 | .83 |
| 3 | 3 (27, 29, 31) | 3.83±2.46 | 1.28±0.97 | .78 |
| 4 | 4 (7, 8, 10, 11) | 5.70±2.65 | 1.43±0.81 | .72 |
| 5 | 3 (1, 3, 21) | 1.91±1.92 | 0.64±0.73 | .61 |
| 6 | 2 (2, 6) | 3.56±1.34 | 1.78±0.70 | .44 |
| 7 | 2 (28, 30) | 3.38±1.52 | 1.69±1.03 | .20 |
| Total | 23 | 33.98±10.43 | 1.48±0.90 | .85 |
| SD: standard deviation | | | | |


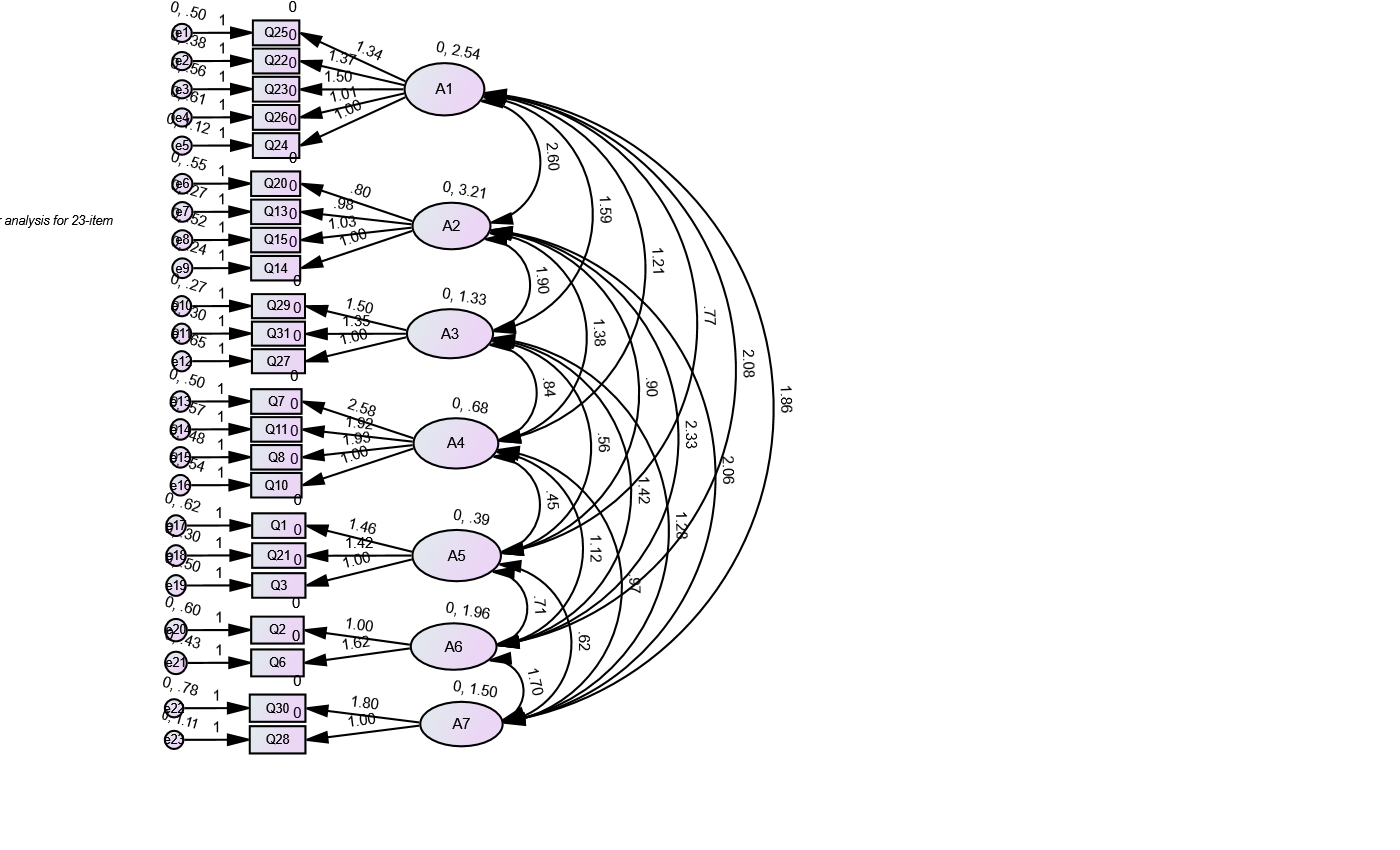


Supplement 3. Confirmatory factor analysis
